# Supplementary material
Source: PubMed Central journal article supplement (PMC2866069)

## SUPPLEMENTAL INFORMATION

### FIGURE LEGENDS

**Supplemental Figure 1. Characterization of the memory subsets prior to co-transfer.** The phenotype of the memory subsets was examined by flow cytometry prior to co-transfer. **(A)** Comparison of the indicated cell surface markers for the HP- and true-memory cells from pooled spleen and lymph nodes. Representative of 5 or more experiments (n=2-6).

**Supplemental Figure 2. Competition between HP- and true-memory cells is observed in alternate infection systems and is not TRAIL dependent.** Co-transferred populations were identified by congenic markers. The percentage of donor cells among total CD8<sup>+</sup> cells in the PBL were measured. **(A)** HP- and true-memory cells generated as described in Fig. 1 were co-transferred into B6 hosts followed by infection with VSV.OVA. **(B)** HP- and true-memory P14 cells were co-transferred into a CD45.1 host followed by LCMV infection. **(C)** TRAIL-KO HP- (CD45.2) and true-memory (CD45.1.2) OT-I were co-transferred into CD45.1 hosts followed by infection with Lm.OVA. Representative of 2 or more experiments (n=3). Error bars indicate SD.

**Supplemental Figure 3. Comparison of the HP- and true-memory cell death and proliferation rates following co-transfer and infection.** BrdU incorporation, Annexin-V staining, and TUNEL staining were measured for the memory subsets in the co-transfer experiment described in Fig. 1. The percentage of donor cells that were: **(A)** BrdU<sup>+</sup> in the spleen, **(B)** BrdU<sup>+</sup> in the lymph nodes, **(C)** TUNEL<sup>+</sup> in the spleen, **(D)** TUNEL<sup>+</sup> in the lymph nodes, **(E)** Annexin-V<sup>+</sup> in the spleen, **(F)** Annexin-V<sup>+</sup> in the lymph nodes. Representative of 5 or more experiments. Error bars indicate SD.

**Supplemental Figure 4. Phenotype of the co-transferred memory subsets on day 6 after infection.**

Phenotype of memory subsets from co-transfer recipients on day 6 of Lm.OVA infection. Comparison of indicated cell surface markers in the **(A)** spleen **(B)** lymph nodes. Representative of 5 or more experiments (n=3-5).

**Supplemental Figure 5. Timecourse of HP- and true-memory cell localization following co-transfer.**

HP- and true-memory were co-transferred into B6 hosts and infected with Lm.OVA. Localization of donor cells in the spleen on days 1-10 after infection was evaluated by staining for CD45.1, Thy1.1, and B220. Representative of 5 or more experiments (n=3).

**Supplemental Figure 6. Localization of the HP- or true-memory subsets following single transfers.**

HP- or-true memory cells were transferred separately into B6 hosts as shown in Fig 1A. Localization of donor cells in the spleen was evaluated by staining for CD45.1, CD4 and B220. **(A)** Single transfer of HP-memory cells on day 6 of infection. **(B)** Single transfer of true-memory cells on day 5 of infection. Images are taken at 20X and are representative of 2 or more experiments (n = 2-3).

**Supplemental Figure 7. Chemokine receptor mRNA expression and chemotaxis for memory subsets.**

**(A)** Expression of CCR7 and CXCR5 mRNA by memory subsets from single or co-transfers. Memory subsets were sorted from indicated transfers on day 6 of infection. Relative expression of CCR7 and CXCR5 mRNA are shown compared to the true-memory single transfer population. **(B)** Percent of absolute cell numbers for each memory subset that migrated in response

to CCL19 (1  $\mu\text{g/mL}$ ), CCL21 (3  $\mu\text{g/mL}$ ) in 3 hr at 37°C: HP-memory single transfer, true-memory single transfer, HP-memory co-transfer and true-memory co-transfer.

**A**

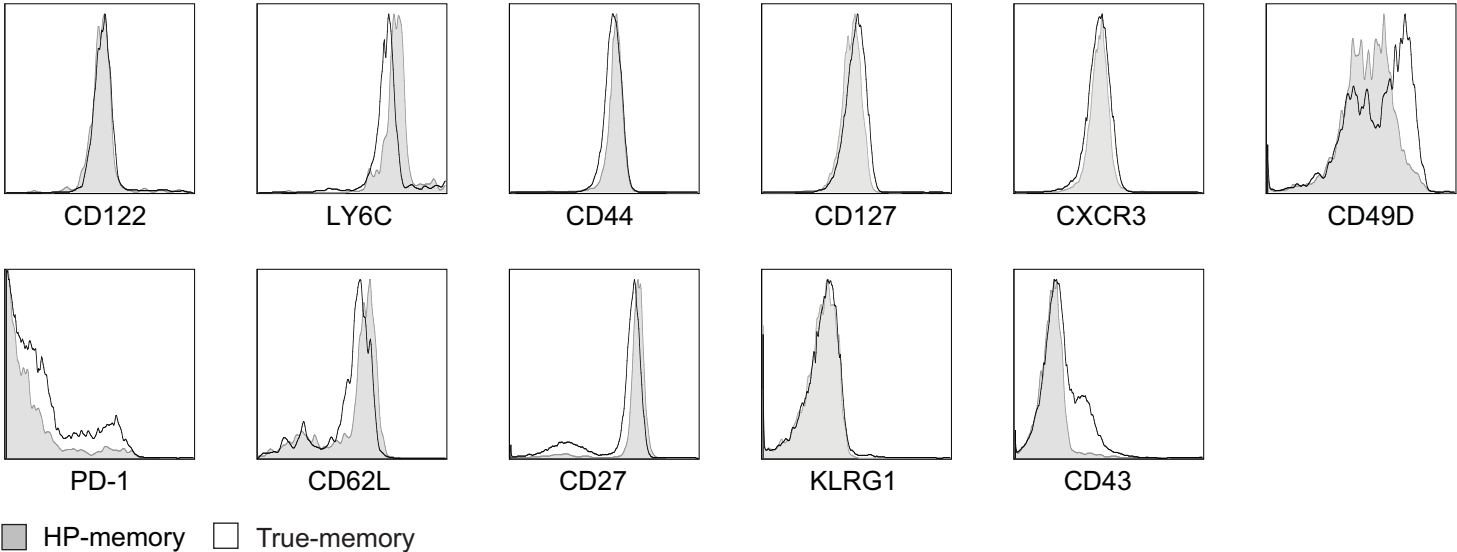

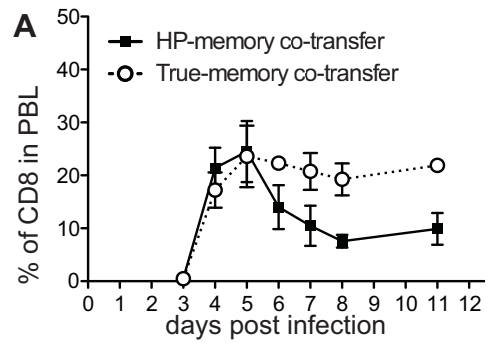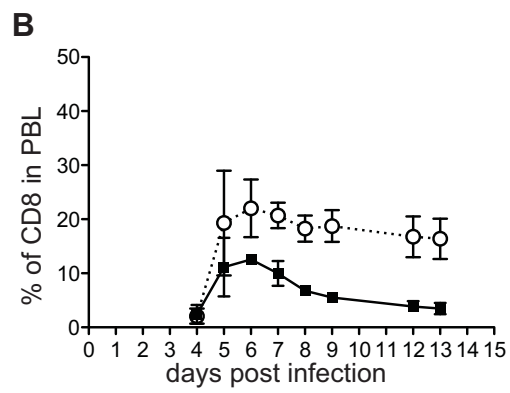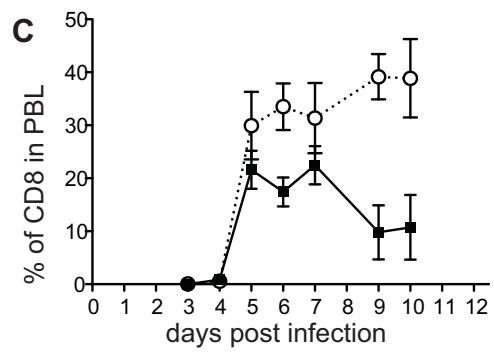

Supplemental Figure 3, Cheung et al.

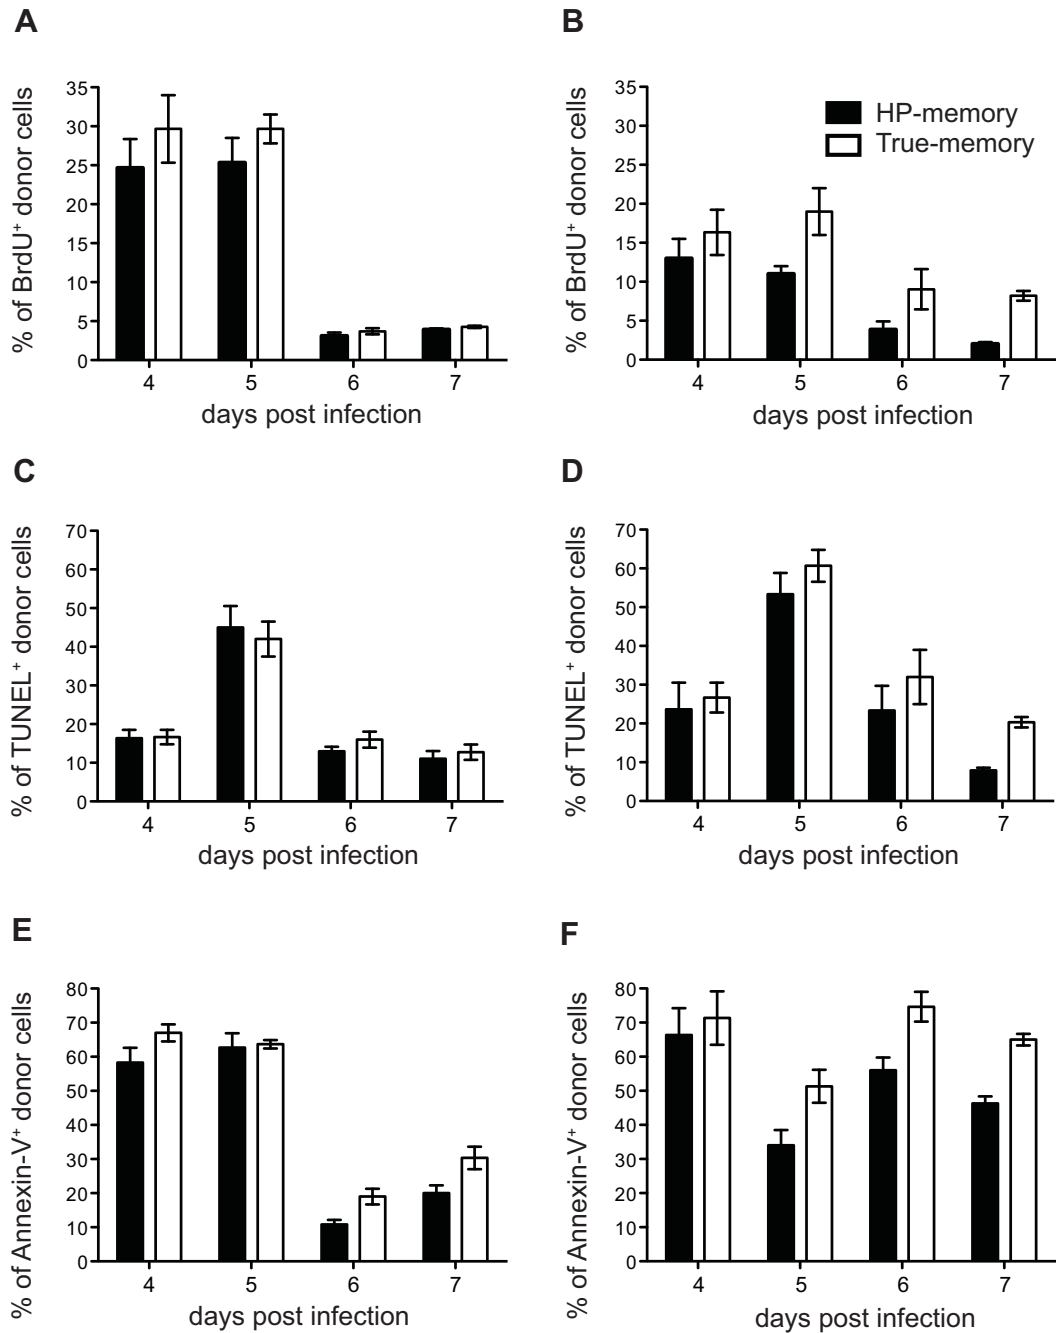

**A**

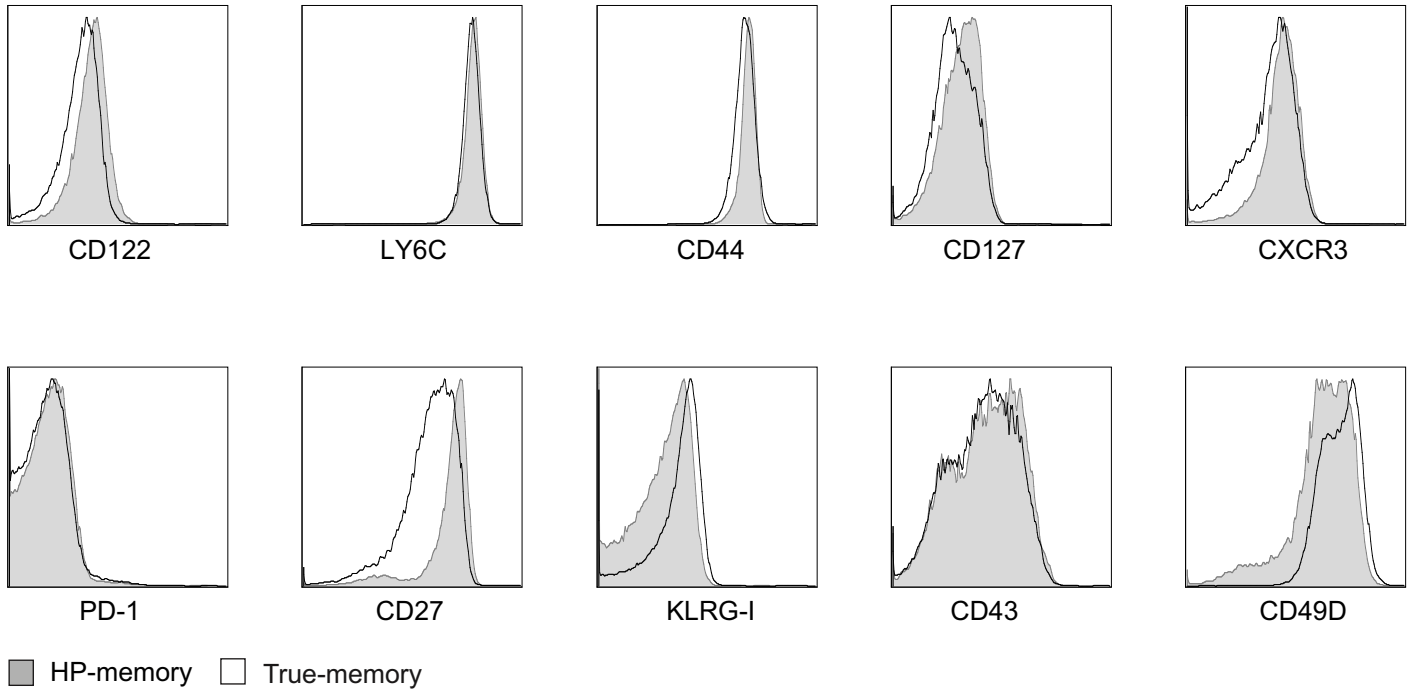

**B**

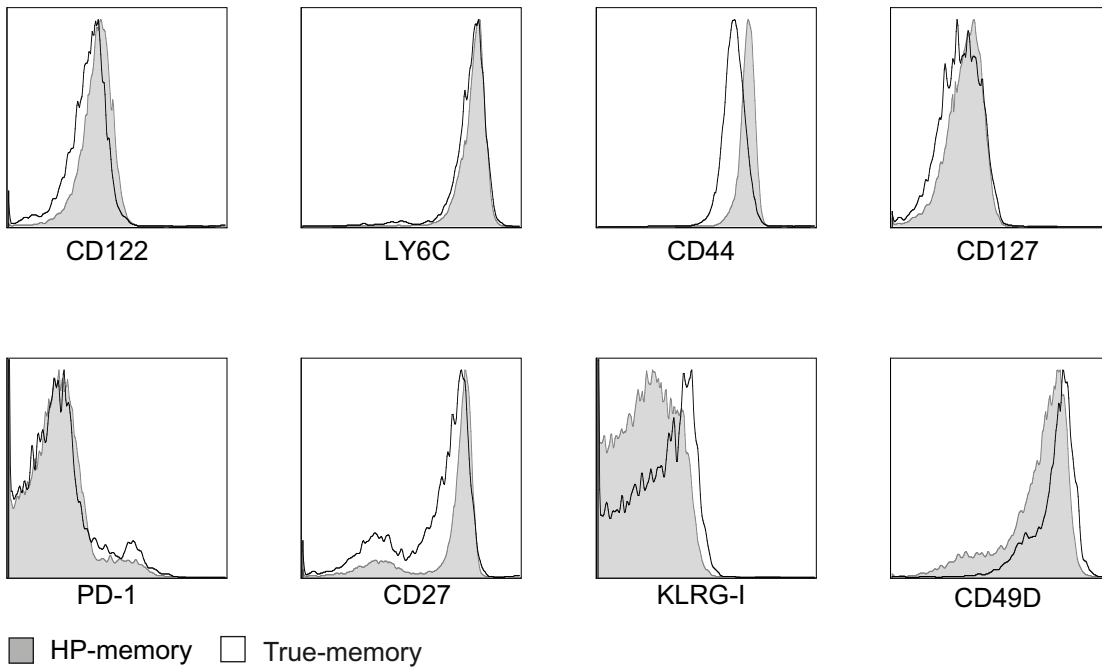

Supplemental Figure 5, Cheung et al.

True-Memory HP-Memory B220

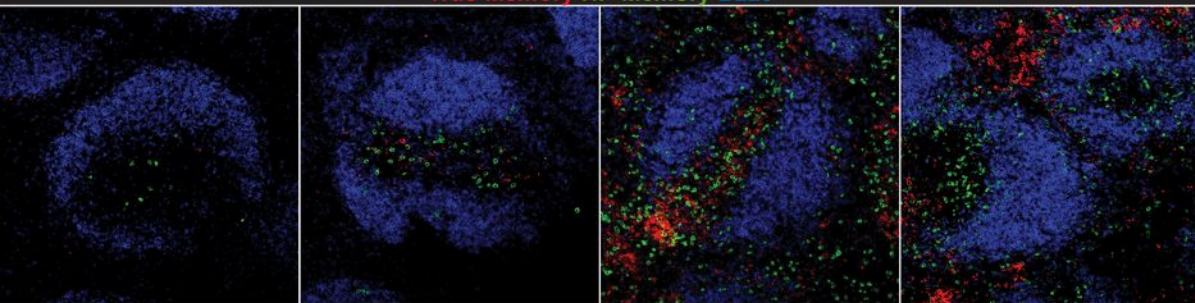

Day 1

Day 2

Day 3

Day 4

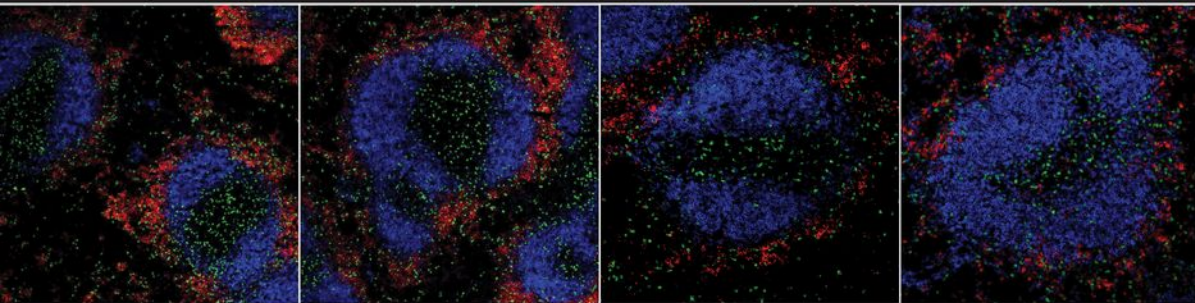

Day 5

Day 6

Day 7

Day 10



Supplemental Figure 6, Cheung et al.

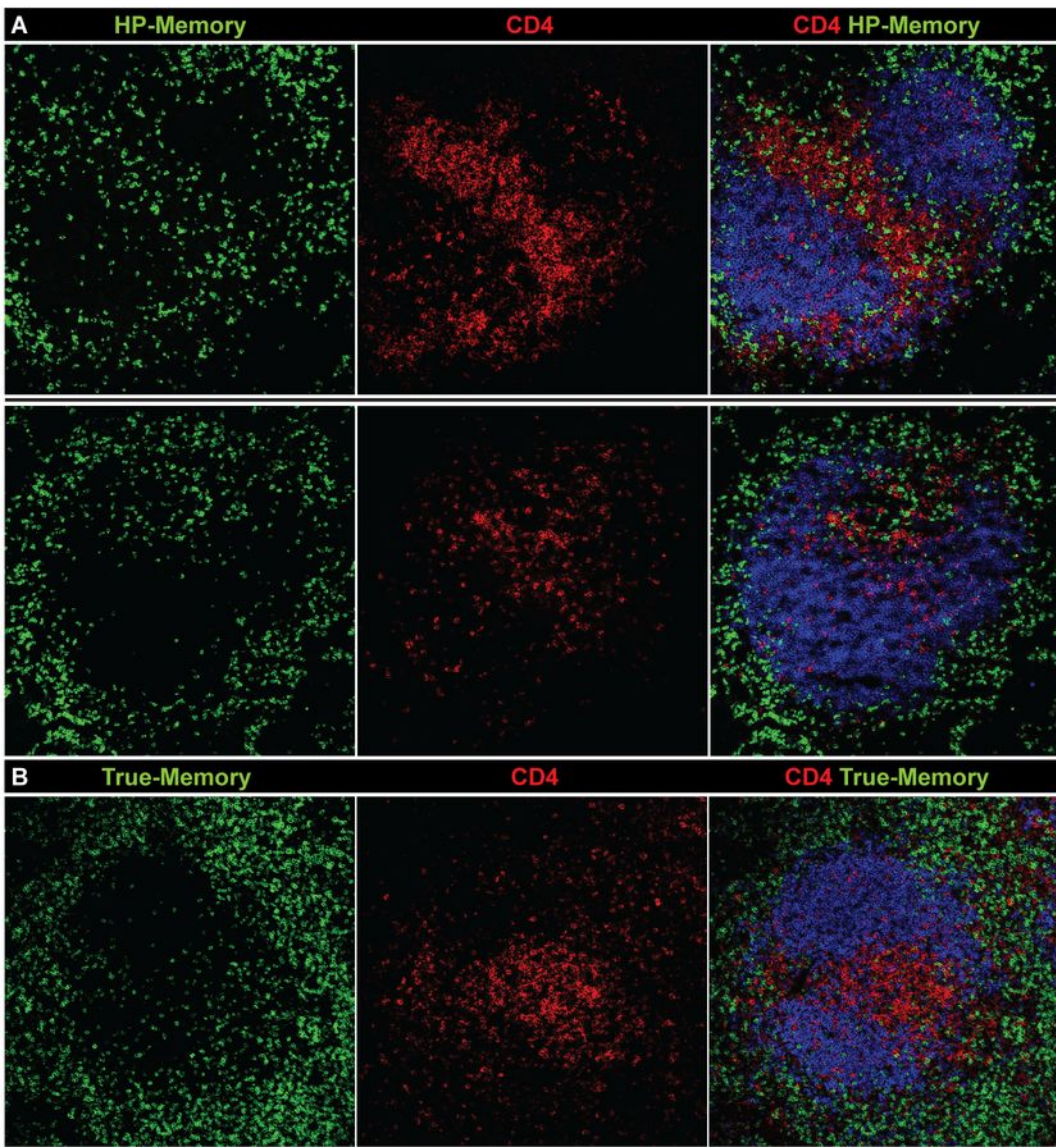

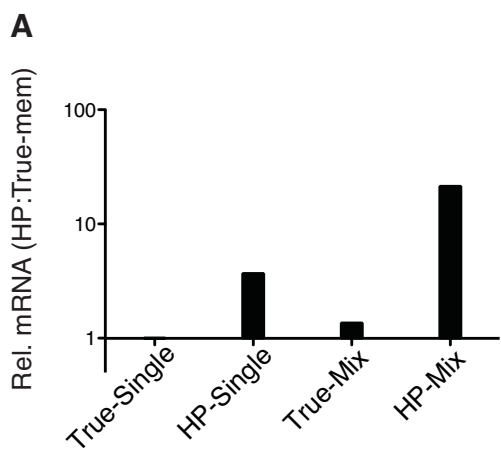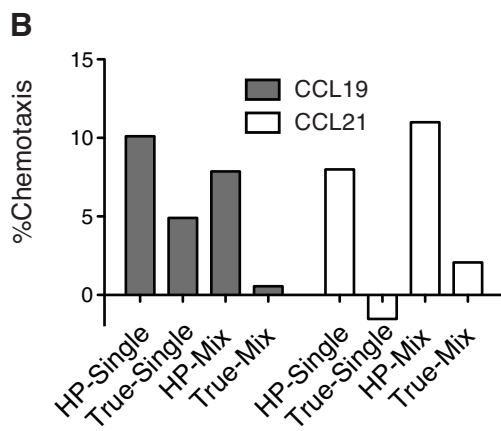

Supplement: NIHMS198256-supplement-supp.pdf [file NIHMS198256-supplement-supp.pdf]
